# Supplementary material for: Adipose Derived Mesenchymal Stem Cells-Derived Mitochondria Transplantation Ameliorated Erectile Dysfunction Induced by Cavernous Nerve Injury
Source: PubMed Central journal article supplement — World J Mens Health. 2023 May 23;42(1):188–201. doi: 10.5534/wjmh.220233 (PMC10782119; doi:10.5534/wjmh.220233), 2023-05-23

## MATERIALS AND METHODS

### Cavernous nerve injury surgery

To establish a cavernous nerve injury (CNI) model, the rats were anesthetized using 2.5% to 3% isoflurane. A ventral median incision of the abdomen of approximately 3 cm was made, exposing the bladder and prostate. The stellate pelvic ganglion was isolated from the lateral upper part of the dorsal lobe of the prostate. The largest branch of the pelvic plexus, the corpus cavernous nerve (CN), extends toward the corpus cavernosum. The CN was clamped bilaterally for 2 minutes with a non-serrated haemostat (Karl Storz) to induce CN injury and establish the CNI erectile dysfunction (ED) model.

The original gel images of SMA and cleaved-caspase3 are listed below.

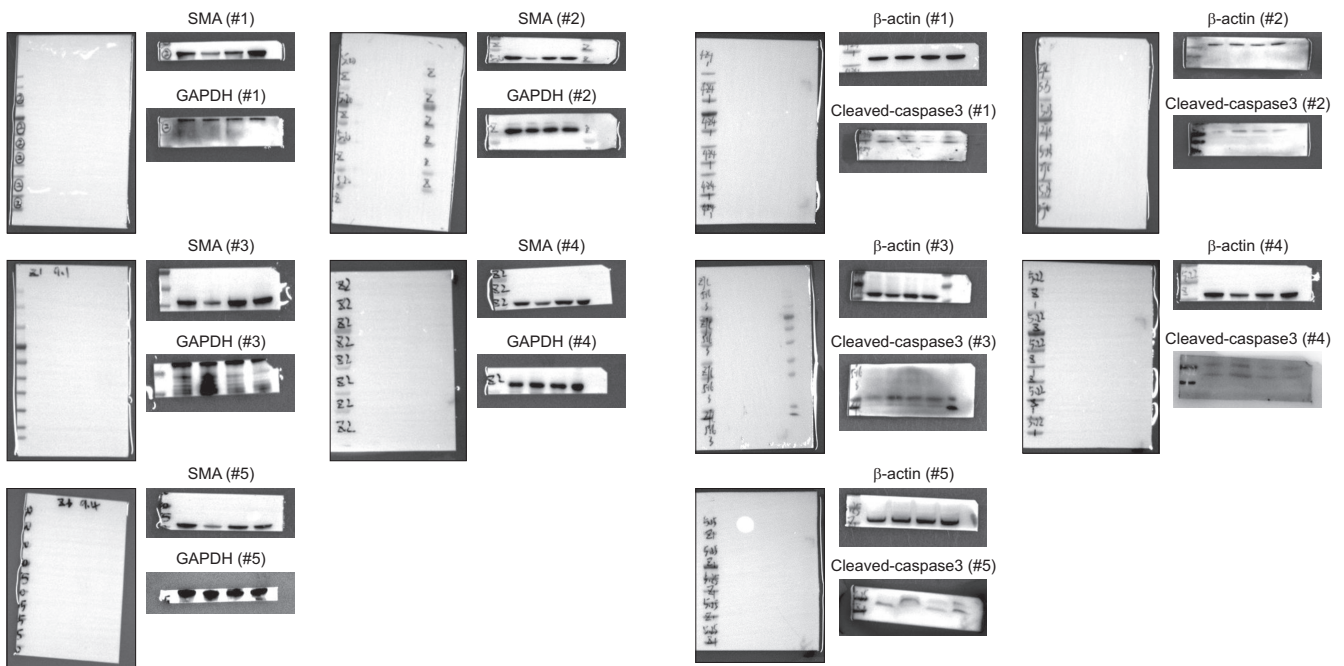

Supplement: wjmh-42-188-s001.pdf [file wjmh-42-188-s001.pdf]
